# Supplementary material for: A Fine-Tuning of the Plant Hormones, Polyamines and Osmolytes by Ectomycorrhizal Fungi Enhances Drought Tolerance in Pedunculate Oak
Source: MDPI journal article supplement (doi:10.3390/ijms24087510), 2023-04-19
Supplement: s1 [file s1]

Table S1. Two-way ANOVA results of variable (ECM, drought and ECM x drought) effects on inspected parameters.

| Parameters                      |                                       | ECM      |                |          | Drought  |                |          | ECM x Drought |                |          |
|---------------------------------|---------------------------------------|----------|----------------|----------|----------|----------------|----------|---------------|----------------|----------|
|                                 |                                       | <i>F</i> | <i>p</i> < .05 | <i>p</i> | <i>F</i> | <i>p</i> < .05 | <i>p</i> | <i>F</i>      | <i>p</i> < .05 | <i>p</i> |
| <b>Osmolytes</b>                | Glycine betaine ( <b>GB</b> )         | 0.066    |                | 7.99e-01 | 15.115   |                | 5.65e-05 | 5.753         |                | 9.00e-03 |
|                                 | Free proline ( <b>PRO</b> )           | 11.207   |                | 3.00e-03 | 287.411  |                | 1.72e-17 | 89.113        |                | 7.81e-12 |
|                                 | Putrescine ( <b>PUT</b> )             | 46.200   |                | 4.97e-07 | 84.796   |                | 1.32e-11 | 40.771        |                | 1.91e-08 |
|                                 | Spermine ( <b>SPM</b> )               | 0.004    |                | 9.52e-01 | 206.542  |                | 7.51e-16 | 44.898        |                | 7.74e-09 |
|                                 | Spermidine ( <b>SPD</b> )             | 64.946   |                | 2.77e-08 | 86.937   |                | 1.01e-11 | 54.006        |                | 1.30e-09 |
| <b>Physiological parameters</b> | Relative water content ( <b>RWC</b> ) | 82.26    |                | 3.19e-09 | 21.313   |                | 4.77e-06 | 2.117         |                | 1.42e-01 |
|                                 | Net photosynthesis ( <b>A</b> )       | 130.735  |                | 3.38e-11 | 102.390  |                | 1.78e-12 | 4.192         |                | 2.70e-02 |
|                                 | Transpiration rate ( <b>E</b> )       | 122.251  |                | 6.67e-11 | 11.047   |                | 3.97e-04 | 47.177        |                | 4.83e-09 |
|                                 | Stomatal conductance ( <b>gs</b> )    | 8.733    |                | 7.00e-03 | 34.943   |                | 7.79e-08 | 8.931         |                | 1.00e-03 |
|                                 | Water use efficiency ( <b>WUE</b> )   | 0.560    |                | 4.62e-01 | 28.313   |                | 4.84e-07 | 10.530        |                | 5.21e-04 |
| <b>Mineral elements</b>         | Nitrogen content ( <b>N</b> )         | 2.397    |                | 0.135    | 2.299    |                | 0.122    | 13.035        |                | 0.000147 |
|                                 | Carbon content ( <b>C</b> )           | 24 2.941 |                | 0.099    | 24 3.559 |                | 0.044    | 2.353         |                | 0.117    |
| <b>Plant hormones</b>           | SA                                    | 41.614   |                | 1.14e-06 | 21.271   |                | 4.85e-06 | 47.683        |                | 4.36e-09 |
|                                 | JA                                    | 1.250    |                | 2.75e-01 | 57.837   |                | 6.62e-10 | 0.762         |                | 4.77e-01 |
|                                 | ABA                                   | 372.245  |                | 4.04e-16 | 119.786  |                | 3.25e-13 | 106.317       |                | 1.18e-12 |
|                                 | OPDA                                  | 73.792   |                | 8.75e-09 | 67.431   |                | 1.41e-10 | 52.268        |                | 1.80e-09 |
|                                 | SAG                                   | 13.212   |                | 1.00e-03 | 26.641   |                | 8.05e-07 | 9.476         |                | 9.26e-04 |
|                                 | SGE                                   | 69.518   |                | 1.51e-08 | 91.418   |                | 5.96e-12 | 19.284        |                | 1.01e-05 |
|                                 | JA.IIe                                | 15.191   |                | 0.000682 | 12.842   |                | 0.000161 | 10.725        |                | 0.000470 |
